# Supplementary material for: Who are the patients being offered the faecal immunochemical test in routine English general practice, and for what symptoms? A prospective descriptive study
Source: HighWire-hosted journal article supplement (doi:10.1136/bmjopen-2022-066051), 2022-09-01

Supplementary data

Who are the patients being offered the faecal immunochemical test in routine English general practice, and for what symptoms? A prospective descriptive study

Supplemental figure 1. Patient-reported symptom patterns

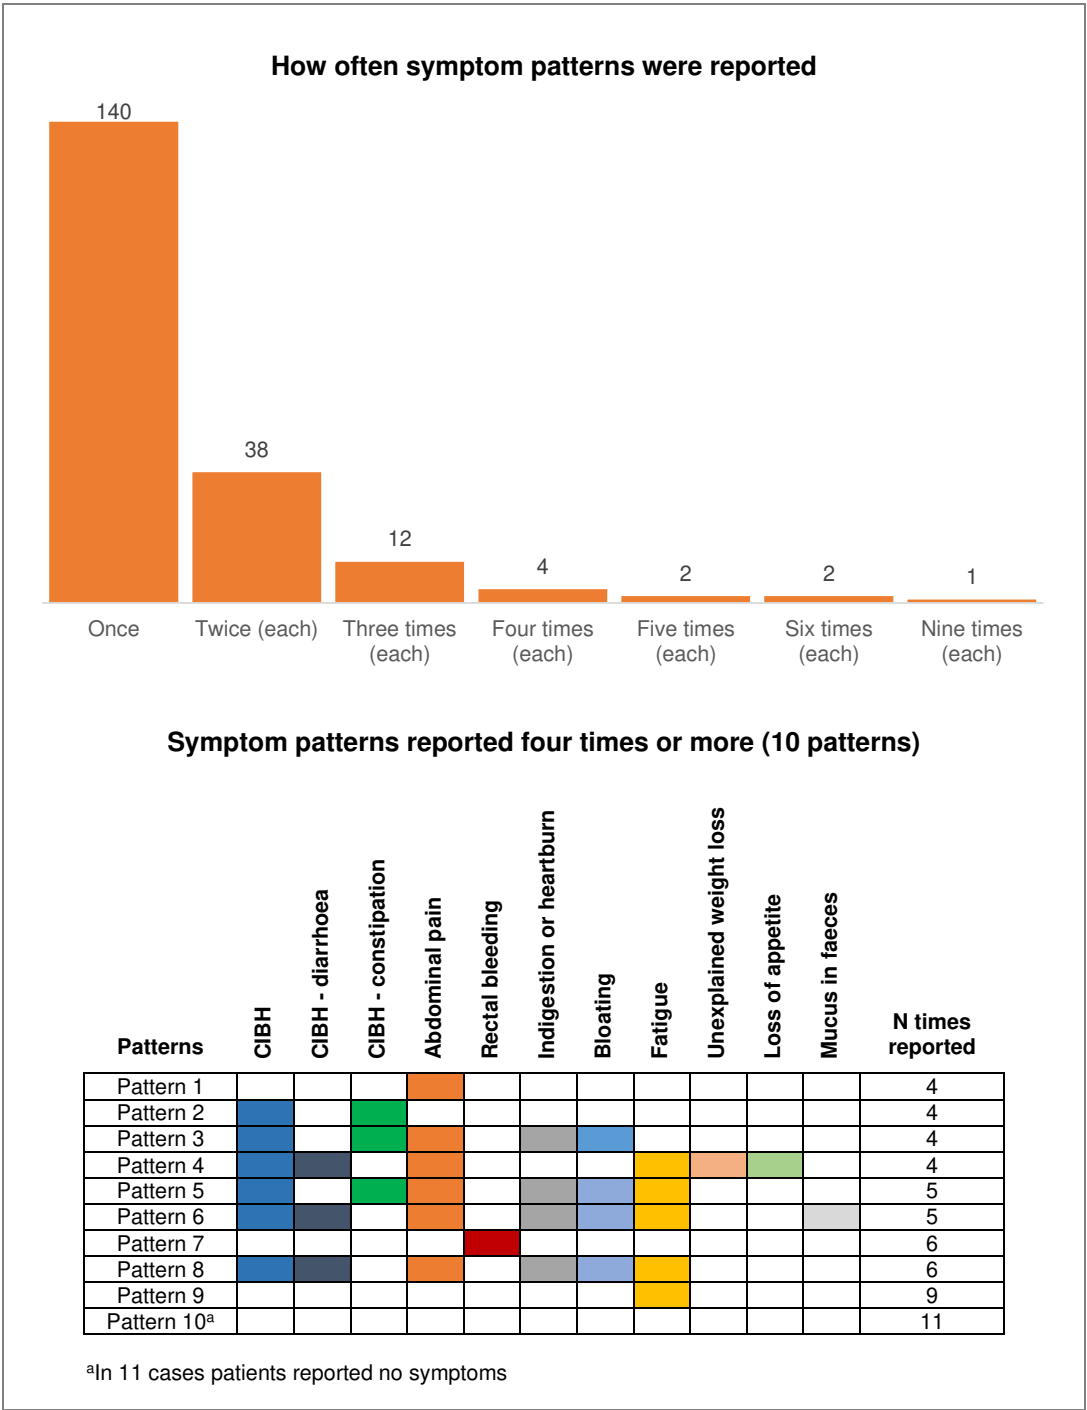

Supplement: bmjopen-2022-066051supp003_data_supplement.pdf [file bmjopen-2022-066051supp003_data_supplement.pdf]
