# Supplementary material for: Who are the patients being offered the faecal immunochemical test in routine English general practice, and for what symptoms? A prospective descriptive study
Source: HighWire-hosted journal article supplement (doi:10.1136/bmjopen-2022-066051), 2022-09-01
Supplement: bmjopen-2022-066051supp004_data_supplement.pdf [file bmjopen-2022-066051supp004_data_supplement.pdf]

## Supplementary data

### Who are the patients being offered the faecal immunochemical test in routine English general practice, and for what symptoms? A prospective descriptive study

**Supplemental table 1. Patient characteristics according to availability of linked data**

| Characteristics                    | Linked data available<br>(full dataset)<br>(n=310) | Linked data not available<br>(n=197) | Tests                            |
|------------------------------------|----------------------------------------------------|--------------------------------------|----------------------------------|
| <i>Age</i>                         |                                                    |                                      |                                  |
| Median age (IQR)                   | 70 (61-77)                                         | 66 (53.5-75.0)                       | <b>U=36222.5,<br/>p&lt;0.001</b> |
| <i>Gender</i>                      |                                                    |                                      |                                  |
| Female                             | n (%)<br>160 (53)                                  | n (%)<br>100 (52)                    | $\chi^2(1)=0.064,$<br>$p=0.80$   |
| Male                               | 142 (47)                                           | 93 (48)                              |                                  |
| <i>Deprivation (IMD Quintiles)</i> |                                                    |                                      |                                  |
| 1 (least deprived)                 | n (%)<br>69 (22)                                   | n (%)<br>30 (18)                     | <b>U=22457,<br/>p=0.04</b>       |
| 2                                  | 74 (24)                                            | 26 (16)                              |                                  |
| 3                                  | 88 (28)                                            | 55 (34)                              |                                  |
| 4                                  | 49 (16)                                            | 34 (21)                              |                                  |
| 5 (most deprived)                  | 30 (10)                                            | 18 (11)                              |                                  |
